# Supplementary material for: Erythrocyte membrane camouflaged siRNA/chemodrug nanoassemblies for cancer combination therapy
Source: Royal Society of Chemistry journal article supplement (doi:10.1039/d2bm01478e), 2022-01-01
Supplement: d2bm01478e1.pdf [file d2bm01478e1.pdf]

## Supporting Information

### **Erythrocyte membrane camouflaged siRNA/chemodrugs nanoassemblies for cancer combination therapy**

Jie Xu<sup>a,b</sup>, Tianbao Chen<sup>a,b</sup>, Tingting Sun<sup>b</sup>, Chunyang Yu<sup>b,\*</sup>, Deyue Yan<sup>a,b,\*</sup>, Lijuan Zhu<sup>a,\*</sup>

*a. Institute of Molecular Medicine, Renji Hospital, School of Medicine, Shanghai Jiao Tong University, 160 Pujian Road, Shanghai, 200217, China.*

*b. School of Chemistry and Chemical Engineering, Shanghai Jiao Tong University, Shanghai, 200240, China.*

*E-mail: chunyangyu@sjtu.edu.cn; dyyan@sjtu.edu.cn; lijuanzhu@sjtu.edu.cn*

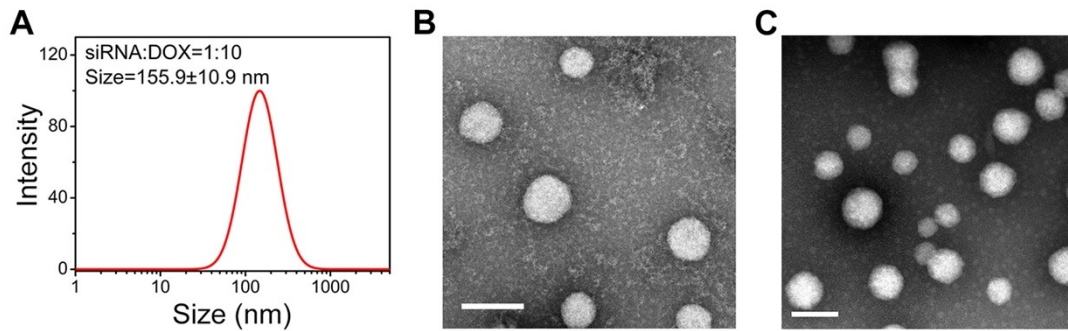

**Fig. S1** Dynamic light scattering (DLS) and transmission electron microscope (TEM) characterization of NP<sub>[siPgp/DOX]</sub> with siPgp and DOX molar ratio of 1:10. (A) Hydrodynamic diameter of NP<sub>[siPgp/DOX]</sub> by DLS. (B) TEM image of NP<sub>[siPgp/DOX]</sub> (Scale bar: 200 nm). (C) Large-view TEM image of NP<sub>[siPgp/DOX]</sub> (Scale bar: 200 nm).

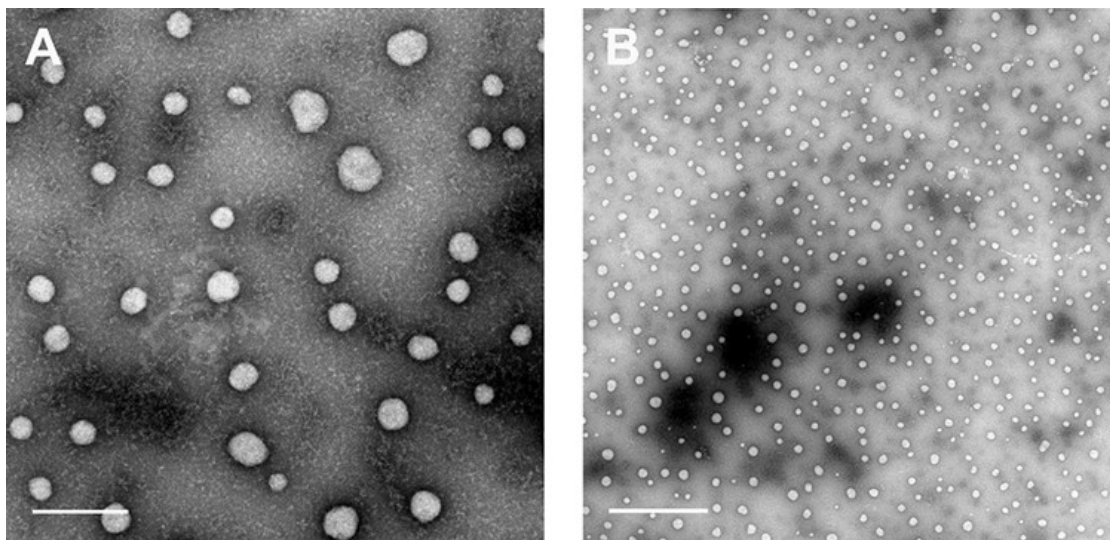

**Fig. S2** Large-view TEM pictures of negatively-stained NP<sub>[siPgp/DOX]</sub>. Scale bar: (A) 500 nm, (B) 2  $\mu$ m.

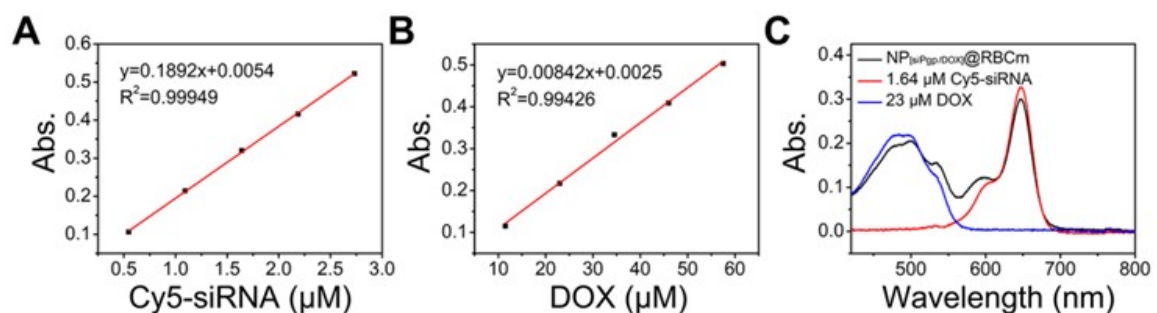

**Fig. S3** Encapsulation efficiency of NP<sub>[siPgp/DOX]</sub>@RBCm detected by UV-vis spectroscopy. (A) Standard curve of Cy5-siPgp in heparin solution,  $\lambda_{ex}$  = 643 nm. (B) Standard curve of free DOX in DMSO/heparin solution,  $\lambda_{ex}$  = 488 nm. (C) UV absorbance curve of 1.64  $\mu$ M of Cy5-siPgp and 23  $\mu$ M of DOX and NP<sub>[siPgp/DOX]</sub>@RBCm after treated with DMSO/heparin solution.

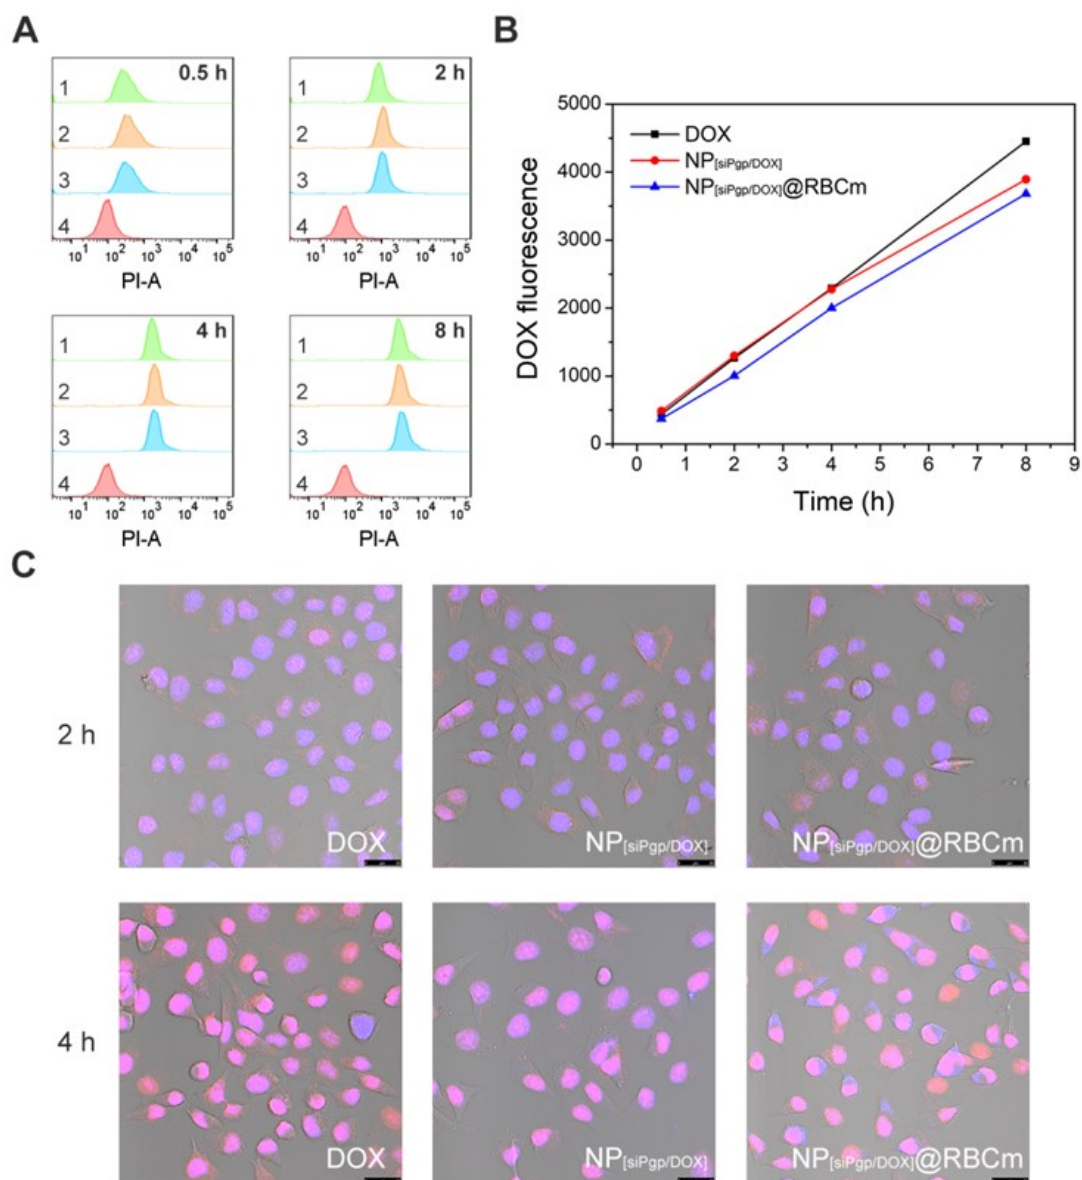

**Fig. S4** Cellular uptake of free DOX, NP<sub>[siPgp/DOX]</sub> and NP<sub>[siPgp/DOX]</sub>@RBCm. (A) Flow cytometry of HeLa/ADR cells incubated with free DOX, NP<sub>[siPgp/DOX]</sub> and NP<sub>[siPgp/DOX]</sub>@RBCm respectively (1. NP<sub>[siPgp/DOX]</sub>@RBCm, 2. NP<sub>[siPgp/DOX]</sub>, 3. free DOX, 4. PBS). (B) Quantitative analysis of flow cytometry of HeLa/ADR cells incubated with free DOX, NP<sub>[siPgp/DOX]</sub> and NP<sub>[siPgp/DOX]</sub>@RBCm for different time intervals (0.5 h, 2 h, 4 h and 8 h). (C) CLSM images of HeLa/ADR cells incubated with free DOX, NP<sub>[siPgp/DOX]</sub> or NP<sub>[siPgp/DOX]</sub>@RBCm for 2 h and 4 h (red: DOX, blue: Hoechst 33342). Scale bar: 25  $\mu$ m.

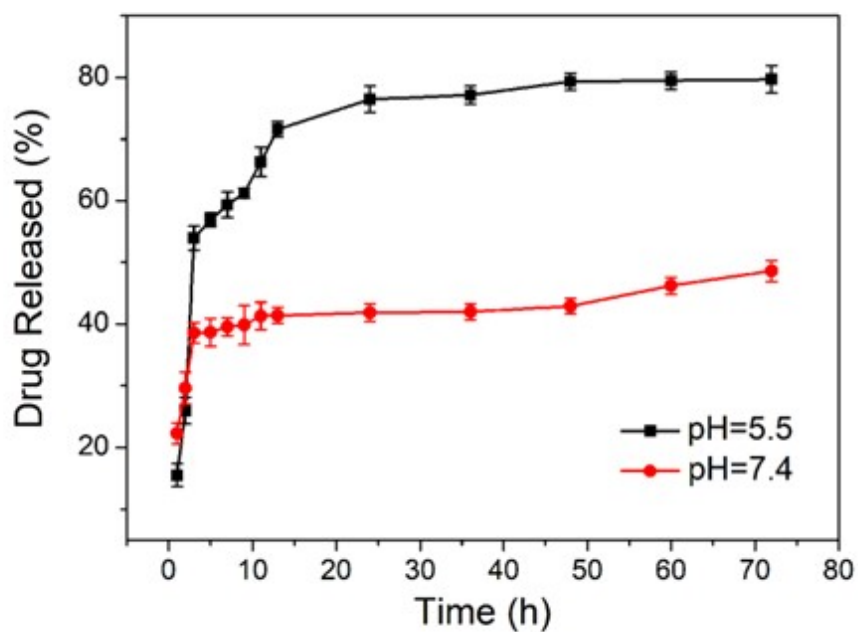

**Fig. S5** *In vitro* drug release profiles of NP<sub>[siPgp/DOX]</sub>@RBCm. UV spectroscopy detection of drug release at different pH values of acid environment (PBS, pH = 5.5) and neutral environment (PBS, pH = 7.4)

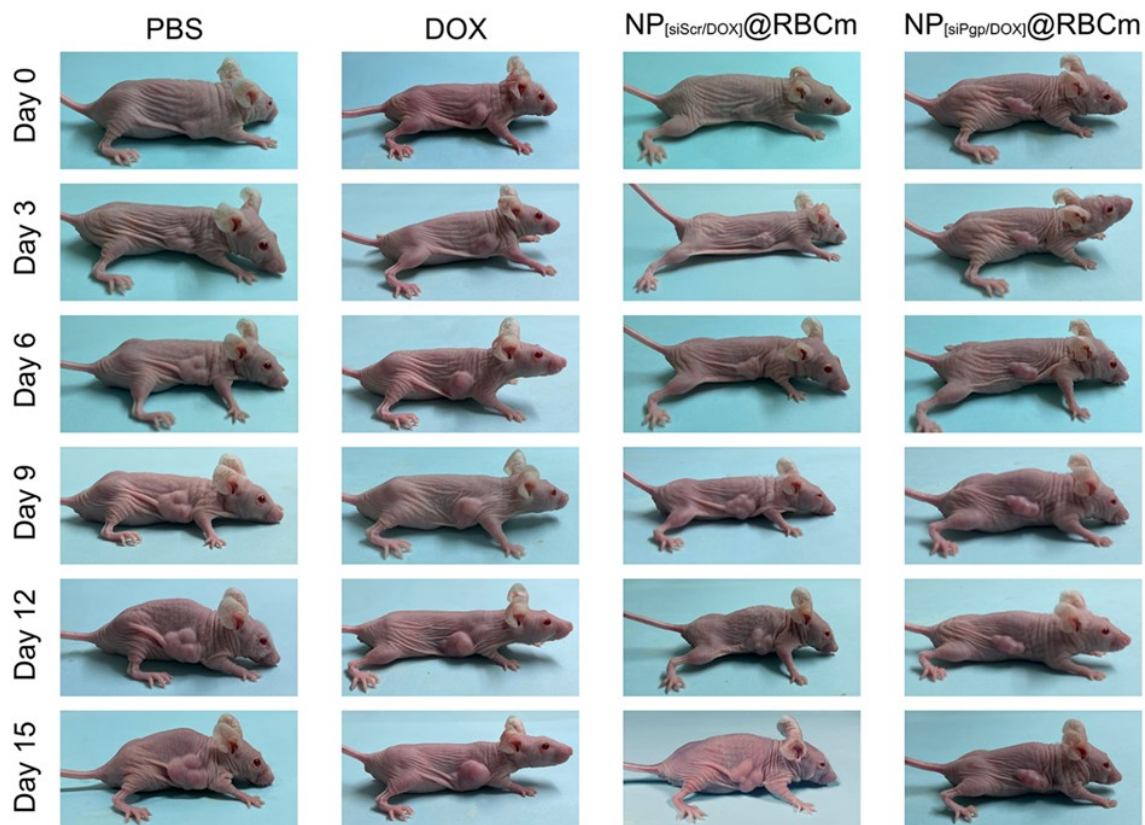

**Fig. S6** Photographs of HeLa/ADR tumor-bearing nude mice.

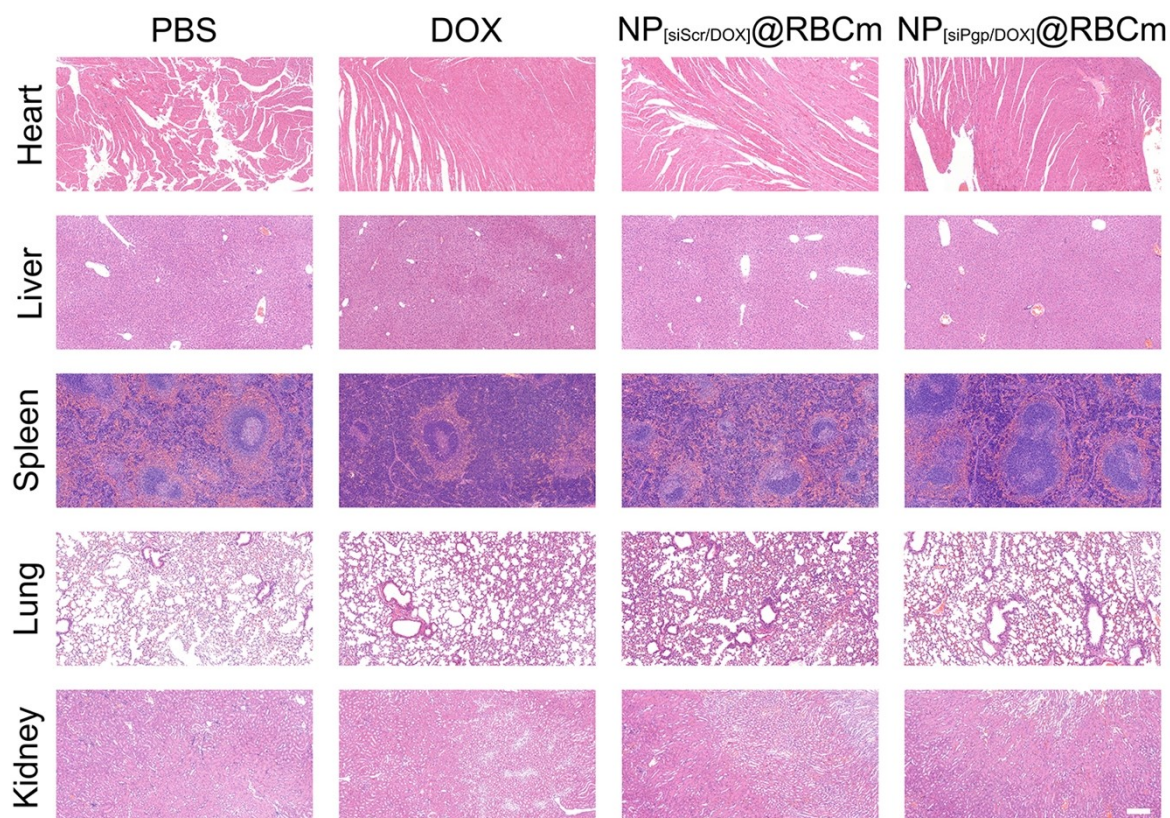

**Fig. S7** H&E staining images of heart, liver, spleen, lung and kidneys of mice after treatments (Scale bar: 100  $\mu\text{m}$ ).

**Table S1.** Repulsive parameters ( $a_{ij}$ ) between beads for DPD simulation used in this work.

|   | P     | N     | D     | W     |
|---|-------|-------|-------|-------|
| P | 25.00 |       |       |       |
| N | 35.00 | 25.00 |       |       |
| D | 15.00 | 35.00 | 25.00 |       |
| W | 26.00 | 40.00 | 50.00 | 25.00 |

**Table S2.** Encapsulation efficiency of DOX and mole ratio of encapsulated DOX and siPgp after  $\text{NP}_{[\text{siPgp}/\text{DOX}]}$  were wrapped by RBCm detected by UV-vis spectroscopy.

| Molar ratio of DOX and siPgp | DOX Conc. ( $\mu\text{M}$ ) | siPgp Conc. ( $\mu\text{M}$ ) | Molar ratio of DOX and siPgp | DOX loading efficiency (%) |
|------------------------------|-----------------------------|-------------------------------|------------------------------|----------------------------|
| 10                           | 7.72                        | 1.48                          | 5.22                         | 18.56                      |
| 20                           | 20.31                       | 1.56                          | 13.02                        | 36.24                      |

**Table S3.**  $\text{IC}_{50}$  values of DOX,  $\text{NP}_{[\text{siScr}/\text{DOX}]}$ ,  $\text{NP}_{[\text{siPgp}/\text{DOX}]}$ ,  $\text{NP}_{[\text{siScr}/\text{DOX}]}\text{@RBCm}$  and  $\text{NP}_{[\text{siPgp}/\text{DOX}]}\text{@RBCm}$ .

|                                              | DOX | $\text{NP}_{[\text{siScr}/\text{DOX}]}$ | $\text{NP}_{[\text{siPgp}/\text{DOX}]}$ | $\text{NP}_{[\text{siScr}/\text{DOX}]}\text{@RBCm}$ | $\text{NP}_{[\text{siPgp}/\text{DOX}]}\text{@RBCm}$ |
|----------------------------------------------|-----|-----------------------------------------|-----------------------------------------|-----------------------------------------------------|-----------------------------------------------------|
| $\text{IC}_{50}$ ( $\mu\text{g}/\text{mL}$ ) | 2.5 | 2.2                                     | 1.8                                     | 1.9                                                 | 0.9                                                 |
